# Supplementary material for: Genome-Wide Identification of Cucumber TDC Genes and Analyses of Their Expression and Functions under Abiotic Stress Conditions
Source: Preprints.org preprint supplement (doi:10.20944/preprints202402.0984.v1), 2024-02-19
Supplement: Supplementary file 1 [file supplementary]

**A: Coding sequences of CsTDC genes.**

**>CsaV3_1G036910**

ATGGGAAGCATCAACAATGAAATCGCTGACATCGACTTTAATGTCGTCAACCCATTAGATCCAGAAGAATTCAGAATTCAAGCACATAAAGTTGTAGATTTCATAGCTGATTATTACAAAAGGATTGAACAATTCCCAGTTGTTAGCCAAGTTGTTCCAGGCTATCTCCAAAAAAGCATACCCCAAGATTCTGTTCCAAATTCTCCTGAATCTTTAGAATCCATTCTTCAAGATGTTCGCCGATATGTCGTTCCGGGTATTACTCATTGGCAAAGCCCAAACTTTTTTGCTTATTTTCCTGCTAGTAATAGCACTGCAGGTCTTCTTGGAGAAATGCTAGGCACTGCCTTCAATGTCGTCGGTTTTAACTGGCTTTCGTCCCCCGCTGTCACCGAGCTTGAAATGTTGGTGCTTGATTGGTTTGGTGAGATGCTTAACCTGCCCAAAGCCTTTATGTTTTCCGGTGGCTGCGGTGGTGGCGGCGTTCTACAAGGGACTACTTGTGAAGCGATTTTATGTACATTGGTGGCTGCAAGGGACATGAAACTTAAAGAGATTGGAAGAGAAAAGATGAGTAAGCTTGTTGTTTATGGTTCTGATCAAACTCATATGTCCTTACAAAAGGCCTTACAGGTCGCAGGCTTTTCTTTGGAAAATTTTCGAGTCATTAAGACAACAAAATCAGAGTCATTTGGACTGTCTCCAACCTCTCTAAAAATGGCAATTCAATCCGACATCCAAAAAGGCTTTGTCCCACTGTACCTTTGTGCAACTATCGGAACGACTTCAACGAACGCGGTCGACCCACTTGACTCACTTTGCGATATAGCACAACAAAACGGAATTTGGGTTCATGTGGACGCTGCATATGCAGGAAGCGCTTGCATTTGCCCCGAGTTTCGACATTTCATGAATGGCATCGAGAAGGCAAATTCGTTCAGCTTGAATGCGCATAAATGGTTCTTCTCGGCGCCAGACTGTTGTTGCTTGTGGCTGAAGGATTCGTCCGCGTTGCGAAACTCTCTCTCTGTGAACCCTACGTATTTGAAAAATAGGGCAACTGATTCGGGTGAAGTAGTGGACTACAAAGACTGGCAGATTACGCTGAGTAGAAGGTTTCGAGCAATGAAGTTATGGGTTGTGATGAAAAGCTATGGAGTGGCAAATTTGAGGAAGTTTTTGAGAAGCCATGTGAAAATGGCCAAGATTTTTGAGGGGCTTGTGGAGAGGGATGAGAGGTTTGAGGTTGCGGTTCCAAGGAATTTCGGGTTGGTTTGTTTTCGATTGTCGCTCGATGAAGACCAGAAGTCGAATATGATTAACTTGAAATTGTTGGAGGGAATTAACAAGACCGGAAGAGTTTACATGACACATGCAGTTGTTGAGGGAATGTATTTGATTCGATTTGCCGTCGGCGGGACGATGACGGAGGAGCGACATGTCGTCATGGCATGGAAGCTCGTGCAAGAAGTAGCCGAAAAGGTCTTGGAGGGGGTTTAA

**> CsaV3_3G028450**

ATGGATAATGAATTGAAGCCGATGGATGCTGAGCAACTCAGAGAACATGCTCATAAAATGGTGGATTTCATTGCTGATTATTACAAAAACATCGAGGATTTCCCCGTGCTCAGCCAAGTAGAGCCTGGTTATCTTCAAAATCTTCTACCAGAATCTGCACCTCTTAATCCAGAATCTCTGCAAAGTGTTCTTGATGATGTCCAGAAAAAGATTTTTCCGGGTGTAACACATTGGCAGAGTCCCAACTACTTTGCTTATTATCCTTCTAACAGTAGCATTGCTGGATTTCTTGGGGAAATGCTCAGTGCAGCTTTCAATGTGATCGGTTTTAGTTGGGTAACTTCTCCAGCTGCTACAGAACTTGAGATGATAGTTCTTGATTGGCTTGCCAAATTATTGAAGCTGCCCGATGACTTTCTCTCGTCAGGAAACGGCGGGGGAGTAATACAGGGAACTGCCAGTGAAGCTGTTTTAGTTGTGCTACTGGCTGCTCGTGATCGAGCTCTAAGAAGATTTGGAAAAGATTACCTTAAGAAACTAGTTGTTTATGCATCTGATCAAACGCACTCTGCTTTACAAAAGGCATGCCAGATTGGAGGGATTCATCCTGAGAATTGCAGATGGTTGAAAGCAGATATTTCTACCAATTATGCCCTTTCTCCCGATGTTCTTTCCGAAGAACTTTCACGTGATACAGCCAGAGGATTAATTCCATTTTTCTTATGTGCTACAGTTGGAACTACATCATCAACAGCTGTAGACCCTCTCCCTGAACTAGGAACTATTGCTAAGAGGCACGAAATGTGGTTTCACGTTGATGCTGCTTATGCTGGAAGTGCATGTGTATGTCCTGAATATCGACAGTACATTGACGGTGTTGAAGAAGCTGACTCATTCAATATGAATCTTCACAAGTGGTTCTTGACAAACTTCGATTGTTCAGCACTGTGGATCAAGGACCGACATGCCTTGATCCGGTCTCTTTCTACGAATCCTGAGTTCTTGAAGAACAAAGCCTCTGAAGCAGAACTGGTTGTGGATTACAAAGATTGGCAAATTCCACTTGGGCGCCGTTTTAGATCATTGAAAGTCTGGATGGTGTTACGACTGTATGGTACAGAAAACCTTCAAAAATACATTAGAAATCATATCAGTTTGGCTGAACGTTTTGAAGCACTTGTACGTGAAGATCCAAGGTTTGAGATTGTTACACCAAGGATTTTCTCTCTAGTATGTTTTCGCCTTCTGCCATCTCGCAAAAATGAAGATGGTGGCAACAGACTAAATCAAAGCCTATTAGATGCTGTAAATGCTAGCGGAAATATTTTCATTTCTCACACGGTTTTATCAGGAAAATACATTCTTCGATTTGCAGTAGGGGCGCCGTTGACAGAGGAAAAGCATATTAATTCTGCTTGGAAGTTATTGCAAGATGTGGCTTCCACTTTGCTTGCAATTTGA

**B: The protein sequences of CsTDC genes**

**>CsaV3_1G036910**

MGSINNEIADIDFNVVNPLDPEEFRIQAHKVVDFIADYYKRIEQFPVVSQVVPGYLQKSIPQDSVPNSPESLESILQDVRRYVVPGITHWQSPNFFAYFPASNSTAGLLGEMLGTAFNVVGFNWLSSPAVTELEMLVLDWFGEMLNLPKAFMFSGGCGGGGVLQGTTCEAILCTLVAARDMKLKEIGREKMSKLVVYGSDQTHMSLQKALQVAGFSLENFRVIKTTKSESFGLSPTSLKMAIQSDIQKGFVPLYLCATIGTTSTNAVDPLDSLCDIAQQNGIWVHVDAAYAGSACICPEFRHFMNGIEKANSFSLNAHKWFFSAPDCCCLWLKDSSALRNSLSVNPTYLKNRATDSGEVVDYKDWQITLSRRFRAMKLWVVMKSYGVANLRKFLRSHVKMAKIFEGLVERDERFEVAVPRNFGLVCFRLSLDEDQKSNMINLKLLEGINKTGRVYMTHAVVEGMYLIRFAVGGTMTEERHVVMAWKLVQEVAEKVLEGV

**> CsaV3_3G028450**

MDNELKPMDAEQLREHAHKMVDFIADYYKNIEDFPVLSQVEPGYLQNLLPESAPLNPESLQSVLDDVQKKIFPGVTHWQSPNYFAYYPSNSSIAGFLGEMLSAAFNVIGFSWVTSPAATELEMIVLDWLAKLLKLPDDFLSSGNGGGVIQGTASEAVLVVLLAARDRALRRFGKDYLKKLVVYASDQTHSALQKACQIGGIHPENCRWLKADISTNYALSPDVLSEELSRDTARGLIPFFLCATVGTTSSTAVDPLPELGTIAKRHEMWFHVDAAYAGSACVCPEYRQYIDGVEEADSFNMNLHKWFLTNFDCSALWIKDRHALIRSLSTNPEFLKNKASEAELVVDYKDWQIPLGRRFRSLKVWMVLRLYGTENLQKYIRNHISLAERFEALVREDPRFEIVTPRIFSLVCFRLLPSRKNEDGGNRLNQSLLDAVNASGNIFISHTVLSGKYILRFAVGAPLTEEKHINSAWKLLQDVASTLLAI

**C: The 2 kb genomic DNA sequences upstream of the initiation codon.**

**>CsaV3_1G036910**

TTCAAAATTGGATCACAAAAATTTATTAAGGGATAATTTAGTTTTGTATGGTTTGTGATGTTCATTCTACTAGAATGCATGGTATTATATAGAGGGAGTTGGAAGGTGAGTTTTCTTTTTTAAAAATTACATGGAGTAAAATAAATTAAATTTAGTTCCCCTAAAATATATTTAAAGTATTATACATATCTGCTACCTTGTTTTCTAGCAATTATTTGGTGTTTAAATTGTGTTTAGTATGTTTTATTATTATATTTATATTTAATTGAAGATTTGACTAAATTTTGTAATTTAACTCAGAAAAAAAAAGTAAGTACCCACAGACTAAAATTTTGATTTCATAAAAATAGATCATTACAAATCTACAAACCTAATTCCTATCATTTATTTGGTGTTTAATTTGTTTAATTATATTTATATTTAATGGAAGATGTGAAATTTTGTAATTTAACGTAGAAAATGATCGTGCCACACGCAACAAGTTAATTATCCTACCAAACCCTAAGATGTGACATGATAATATAACAAACTCCAATTAATTGACTATCAAATTTATGGCCATTTTCTAAAAAGATGCAATTAAAACCTTTCATTGTAAACATATTTAAAAATAAAATATGAATGTCCTATTTTTGTCCTTAAATTTTGTATCTTGTTCTAAAAGTCACCAAACTTTTAAAAACCTTTATTTTGGTTGTCAAACTTCTGAAAAAGTTTACTTTGTACATGTTGTTAGAGTTCCCTTAACTTTAAGGAAATGATTGTTTGACTTCTATATTTGATTAATTAGGCCACACTTCATCTTATTAATTAAAATTATAGAACCAAGAAATCTGGCTAATTTATATGCCAAAATAAAGACATAATCAATACACTTGAATCAAATAAATCAAAATTAAAATCTAATTTTGTTCTTTTTCCTCCAAATTAAGCTTAAATCTTTCACATATCTCTTGACTACCTACCCTTTATTTACTTTCTTCAAATCAAAGGAACAATATTGAGTAGAATAAAAAAATACTTTTCAATAAAGACCGACACATATTATTGGTGTTAAAATCCATGACAAGGTAAAATAAATTAGAAAAATAAAATAAGTACAACACATGTATAAAATATACTCTACCAAATTTCACATAAATATTCACAAAATAAAAAAAAAAAGAAGAAGAAGAAGAAGAACGGATTGAGTGTCACACCCCGTTCTAGGTTTTCCCTTCTAACCTAGATTGTGGTGTCAACCTACTCTTTAAAAACAACATTTTTCAACCTAAACTTCTATAGAACGAGTATTATAAAATTCTCTATAGAACGAGTATTATAAAATTCTACATAAATTTCGACAATATCTCCCCTAGAATATGGGTTAGCCAAACCTAAAAAGAGGTGAAAATTACAGTTCTATACATATATGAGATCTTTGGACACAAAATCCCTTCGAGTGTGTCTCACCATGCACTGATCCAAACTATTTCAGAGTTCCAAATAGAGTTCATATCCAAACCAGATATTAATTACAAAATAATTATAGACTAATGAGGGATTTCTCAAAATACATGCCCACAACATGTCTCTCGCTATTTCTAGTAGCCTCGTATTGCAATACAAAACTTAAGTATATACATACAAAGAATGAAACTAATCTACAATCAATGACAGGAAACAATGCTTCGTCCATGACCGCTACCTGAAGGAGGGGGAGGTGGGAGGAGGGAGGGGGGAGGGAGAGAGAGAGAGAGAAAAAAAAACATTGAAAACGTGAGCTAAAACTCAGTGAGTGGTAAGTTTTTTAGAAGTAAGAGCTCGTAAAATATGCTTTTAAAAAATGTATAAATATGCATCAATAATGAAATAGTAATTAAAATATTATTATCATATATTACGTAAATCACAAGTAATGCTAACAAATCTGTGTACGCAATCCAACTATGGTAAGGCGCCTAAATATACGGCCAAGAATATCTCACACACGATCAAGGAATCTTGTAGCCAAACCTAAC

**> CsaV3_3G028450**

TTCTCTGCTCGGACTTCTCGAAACTGAGTCCGGTGAGATGTTTGAATAATCCGACGAAGTAACCAACAATCAATGGTGAAGCGGATAGATAACGAAGACGACGATGGTATCGATTGGATATTATTATTCACGCCAATTATCAATTTCATTATCGAACTTTTAGCATCATTTTACACTTCCATTATAACTCTTTTTTAATATTGTTTTAGTGGCAATTAATATTGTGTTAGTGGCAATTTTGTCCTTCAATATAAAATGTGGAAGTTGATTAACTTTTTAACCTCATTTTCCCTAATCATTATAACTCCTTGTAAGTATTGTTTGAGTGGTAATTAATGTATGTTGAATTCTTAACTTTTCACCACCTTATTAAAAAAAATTAATTCTATAAACGTGTATTAGTTAATAATGTAATTCTTATGTAACCAATTCCATGAAACGACGGAAAAGACCAATAACAAAATACACTTTCTTAAAAATGAAAAACTCAAAATTTAATGAAATTTGTATTAAATAAATGTTCGAAAGACATAAAATTAACAAAACCAATAAAAAAAATTTTAAAATGTGACTCGTGGGTACTAACAATTTTCTTTTTGAAATAAAGATAAACATATGAGACAACTTTAAATAAAGTTTCTAAAACCATGGATCTTTCCTGTCACTCGTCAGATTCCTGAATCATCTACTTTTGCTTGAAAGATTAAACATAGAAAATAATGAATATATAAAAGATACCCAATAAGGGACTCACTACTAGTTACGCTAGGTGTATGTAACTTTTCAATAAGACTTCGTGAGGAGGTACCCGAAACTATCGTTTGTCCGATGGAACACACGCAATCTAGTGATCCTGAAGAAACACTCTCATTTATCGATGAACCCAAAGGAACACCTATGTATCGGGCTATAGTGATCTCGTCGAACCACTCATAAACATAACATGACAGTATTATGGTCGACACACACTGTCATAAATTTGTGAAAATGTGGTGATCCCGAGGGACTCCCATGTGGATATAACCTTAATAGACAAAGTTTACATAACATCTATCCATAGCATGTAGCATCATCATAAACATTGCATGAATATTAATCATAACATCCTTAATCATGTGATTAATATATCATGTATCATGAACATCATAAACATATTAGTCATCATCATCAACATAATATCATAATCATCATCAACGTCATATTATGCATTTTAGTTTTCATCAATGCATAACCTTAAATACATGCAAGCTCTTAAATTCATGTTCGAATGTCCAGTAGTATAATCTCTTATCTGAGAGATTTGCCAAACAAAATACTTTTTAGCTTACAATAAAAAATTTCAATTGATCTTAAAAATTTAGGTTGAAACCAATTCAACCTTGATGGAAAAAATTCATCATTTAAACCTTCAAGATTTGCTAAAGGGGCCTTCCAAAGGCAATCAACCAAAAACAATTCCAATAATAACTTAATTTAGAGTCTCAATTAATTAACCTTTAATGCGTATTAAAAATTTCACAATAAAGATCCAAAACACTCACCAATATGAAACACTGAGCATTGGATATAAAAACCATGTTATAAACAAGACTCAAAGAACACAACCTCAATAGCCCCAGAACCAATTTAATATCAACCCCTAAGGTAGGCTAGATTGAGTTACTTAGGTGAGCTAAGAAACCAAGGATCGAACAAAGTTAGCAACTCCCATCAACCCTCGATCTTCAAAGCACTCCACAAGTAAGGTATATAAATTTCACTTGCATGTTCCAAATATTCATCTATCTATCACAAGAACAAAATTCTACATTTTAAAATTTTCAGACTTCATTCCTCCAAAATCTTGTTTTTTTAAATATGAAAATTACAACCCTATTTATAGTAATTAAAATATGAAATAAAAGGTCACAACATTTTATTTTATGCCCTTTCAACTACCATAATTAATGAAAACACATAAGTACATAATTTCTTAGACATTTAATTTTATGACTTTTGAG
